# Supplementary material for: Metal 3D printing technology for functional integration of catalytic system
Source: PubMed Central journal article supplement (PMC7428005; doi:10.1038/s41467-020-17941-8), 2020-08-14
Supplement: 41467_2020_17941_MOESM3_ESM.pdf [file 41467_2020_17941_MOESM3_ESM.pdf]

## **Description of Additional Supplementary Files**

File Name: Supplementary Movie 1

Description: Metal 3D printing processes via selective laser sintering: the alloy powder was first packed in a raw material vat and the base plate was mounted under the laser source; then, modeling data of the virtual reactors were set in the control system, and the reactors were rapidly printed on the base plate; after removing the residual alloy powder, the reactors were obtained by dismounting the base plate.
